# Supplementary material for: The Antileukemic and Anti-Prostatic Effect of Aeroplysinin-1 Is Mediated through ROS-Induced Apoptosis via NOX Activation and Inhibition of HIF-1a Activity
Source: MDPI journal article supplement (doi:10.3390/life12050687), 2022-05-05
Supplement: s1 [file s1]

# Supplementary Data

## 1. Supplementary Figures and Tables

### 1.1. Effect of Apl-1 on the migration and EMT activation-induced with TGF- $\beta$ 1 in human prostate cancer.

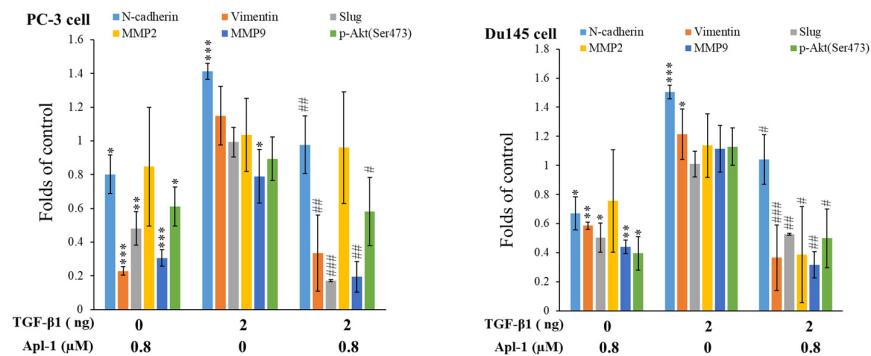

Supplementary Figure S1. Quantitative western blot analysis to determine protein expression of EMT-related biomarkers. The results are presented as the mean  $\pm$  SD of three independent experiments. (\* $p < 0.05$ ; \*\* $p < 0.01$ ; \*\*\* $p < 0.001$ , control vs Apl-1 group). Compared with the group containing TGF- $\beta$ 1(# $p < 0.05$ ; ## $p < 0.01$ ; ### $p < 0.001$ , TGF- $\beta$ 1 and Apl-1 co-treatment group).

### 1.2. Apoptotic effect of Apl-1 on leukemia and prostate cancer cells

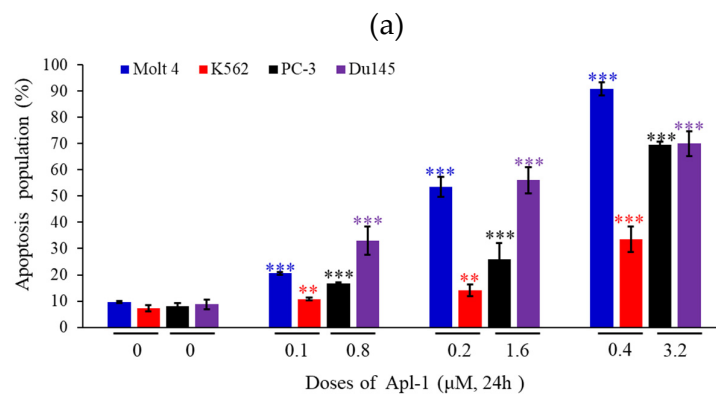

(b)

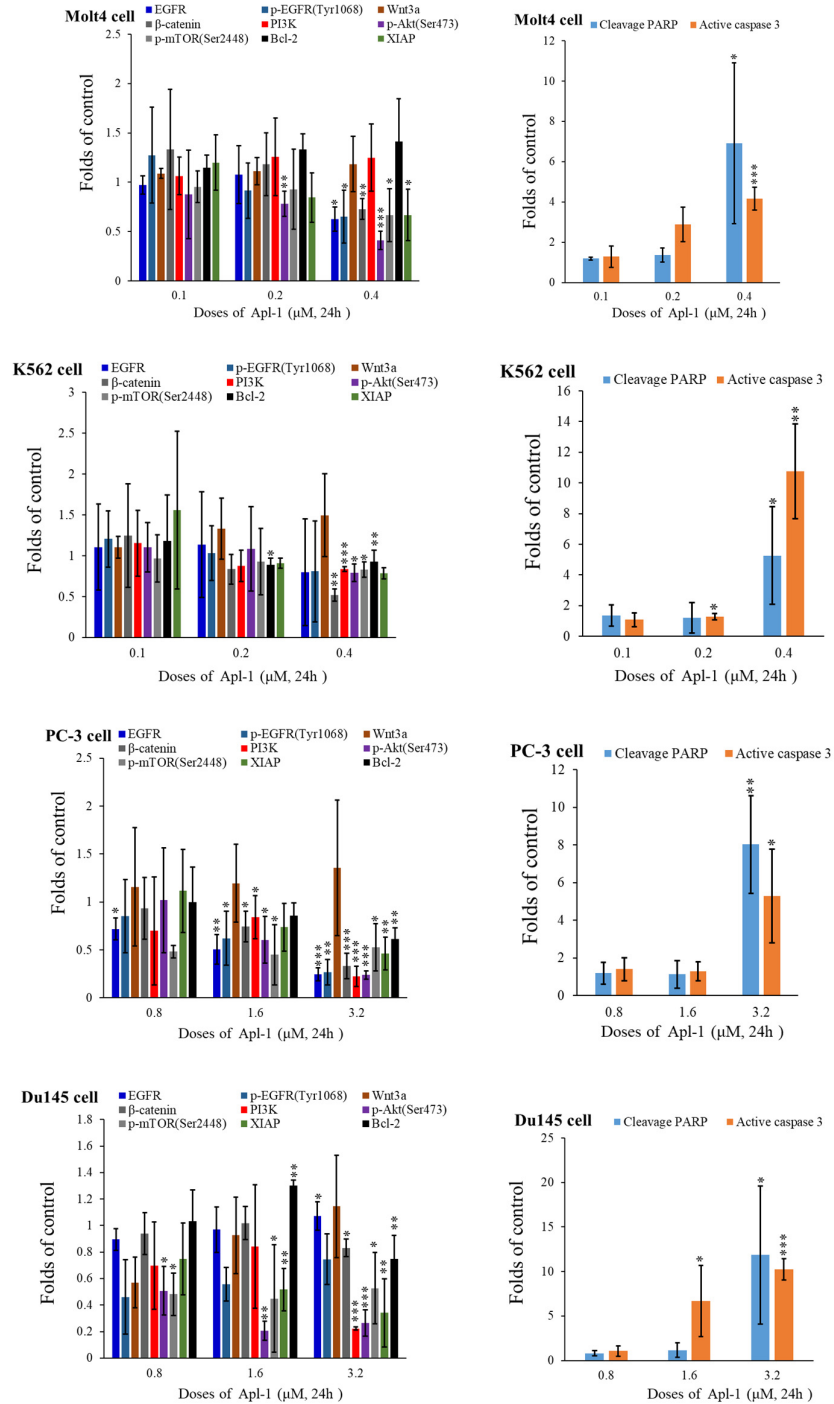

Supplementary Figure S2. The apoptotic effect of Apl-1 on leukemia and prostate cancer cells is mediated through mitochondrial dysfunction and PI3K/AKT pathway. (a) Quantify the percentage of apoptosis marked by Annexin V/PI staining. (b) Quantification of densitometric values of apoptosis-related proteins and PI3K/AKT pathway proteins. (\* $p < 0.05$ ;

**\*\* $p < 0.01$ ; \*\*\* $p < 0.001$ , control vs Apl-1 group).**

### 1.3. Apl-1 induced NOX-mediated ROS in prostate and leukemia cancer cells

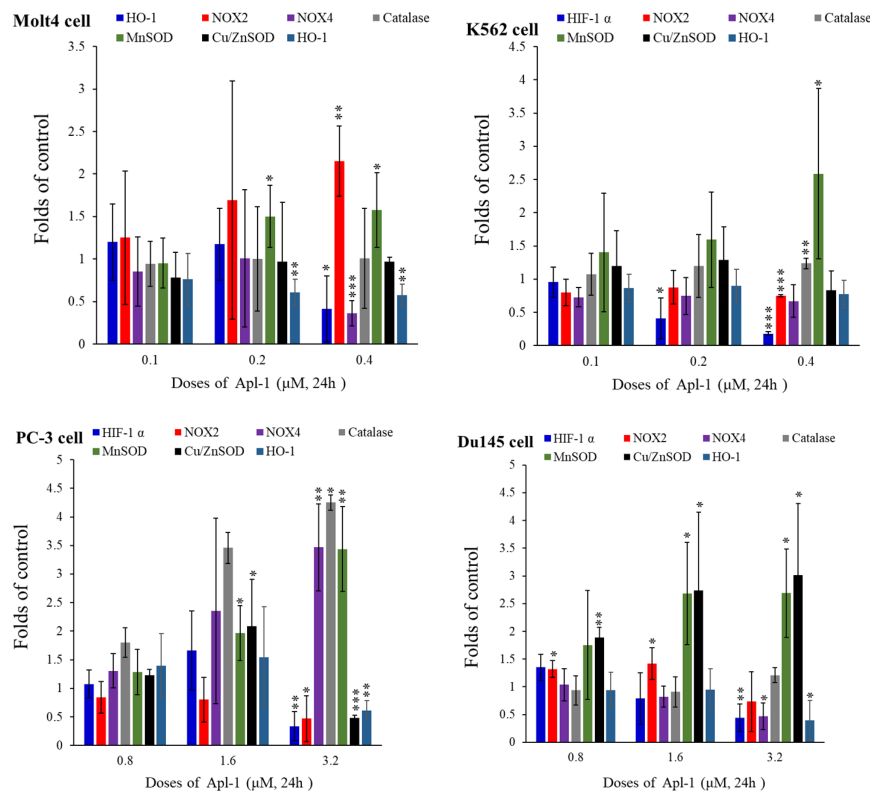

Supplementary Figure S3. Apl-1 promoted the production of ROS by cancer cells in leukemia and prostate cancer cells. Densitometric values to quantify protein changes associated with intracellular oxidative regulation. (\* $p < 0.05$ ; \*\* $p < 0.01$ ; \*\*\* $p < 0.001$ , control vs Apl-1 group).

### 1.4. The induced apoptosis of Apl-1 is mediated by excess NOX/ROS production.

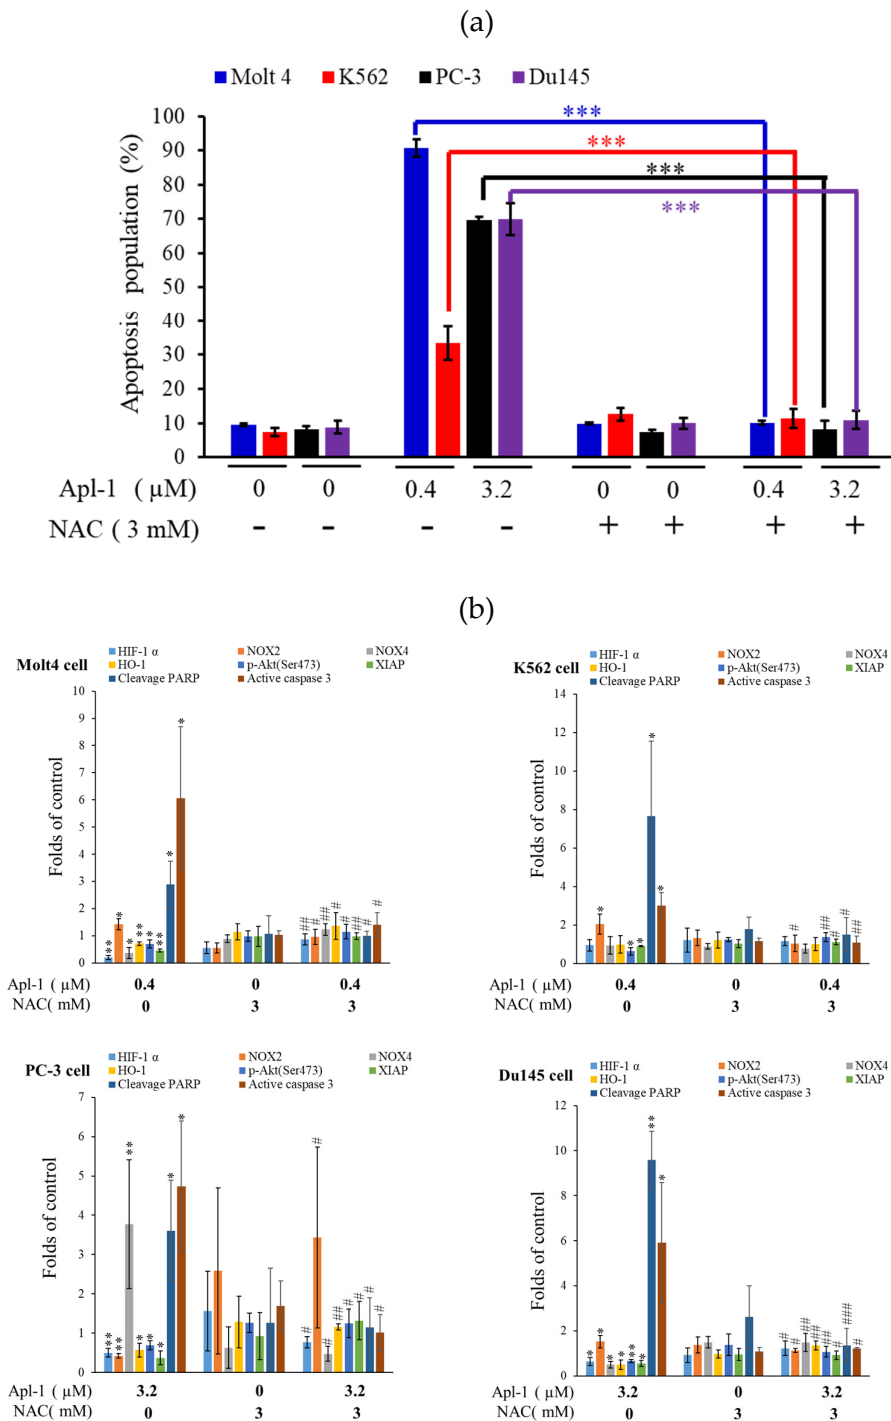

Supplementary Figure S4. Apl-1 induced apoptosis via Nox/ROS. (a) To quantify the percentage of apoptotic populations that were pretreated with NAC for 30 min and then treated with different doses of Apl-1 for 24 h.(b) Quantitative Western blot was used to detect the NOX/ROS-mediated apoptosis-related proteins regulated by NAC pretreatment on Apl-1. (\* $p < 0.05$ )

0.05; \*\* $p < 0.01$ ; \*\*\* $p < 0.001$ , control vs Apl-1 group). Compared with the group containing NAC (# $p < 0.05$ ; ## $p < 0.01$ ; ### $p < 0.001$ , NAC and Apl-1 co-treatment group).

### 1.5. Interaction of Apl-1 with Topo II and Hsp90 proteins

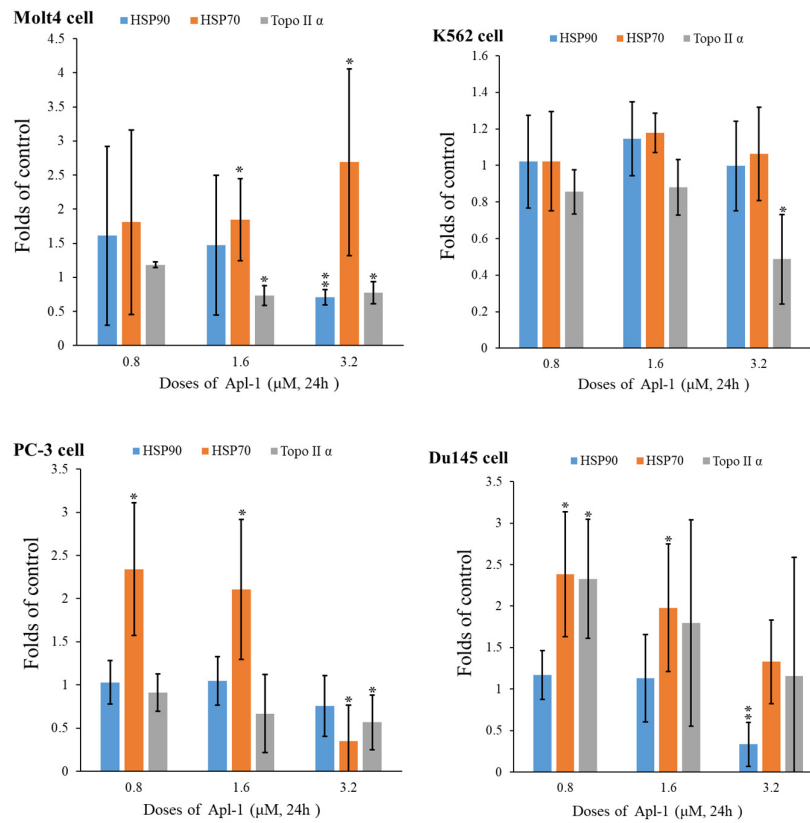

Supplementary Figure S5. The effect of Apl-1 on the binding ability of Hsp90 and topo IIα protein. Quantification of expression of Hsp90 and topo IIα-related proteins was analyzed by western blotting.
